# Supplementary material for: Contamination Rates and Economic Evaluation of Reusing Medicated, Preservative-Free, Single-Use Eye Drops
Source: Research Square preprint supplement (doi:10.21203/rs.3.rs-8042282/v1), 2025-11-18

Supplement 1. Disease caused by the contaminants of our study and its average treatment cost, which is used to perform the decision tree.

|  | Causative Agent 1,2 | Disease | Antibiotic Treatment | Treatment Average Cost |
| --- | --- | --- | --- | --- |
| 1 | *Staphylococcus aureus* | Keratitis  Conjunctivitis  Blepharitis  Incidence probability: 0.05 (rare) | -Chloramphenicol, or  -Tobramycin, or  -Fusidic acid | 5.375 EGP  22.816 EGP  19.43 EGP |
| 2 | Fungi | Keratitis agriculture season  Incidence probability: 0.001 (extremely rare) | -Natamycin, or  -Voriconazole | 37.5 EGP  725.2 EGP |
| 3 | Gram negative | Keratitis *Pseudomonas aeruginosa*  Conjunctivitis *Escherichia coli* Incidence probability: 0.01 (very rare) | -Tobramycin | 22.816 EGP |

1. Teweldemedhin M, Gebreyesus H, Atsbaha AH, Asgedom SW, Saravanan M. Bacterial profile of ocular infections: A systematic review. *BMC Ophthalmol*. 2017;17(1). doi:10.1186/s12886-017-0612-2

2. Forrester J V., Dick AD, McMenamin PG, Roberts F, Pearlman E. *The Eye: Basic Sciences in Practice*. 4th ed. Elsevier; 2016. doi:10.1016/C2012-0-07682-X

*Supplement 2. Conceptual model for getting an eye infection*

The patient reusing the vial is expected to take 2-3 days to develop symptoms of infection. Then take about one day for medical consultation that will refer them to topical treatment. After that, the duration of treating this simple infection is between 3-5 days. Lastly, one day is needed for complete resolution.

*
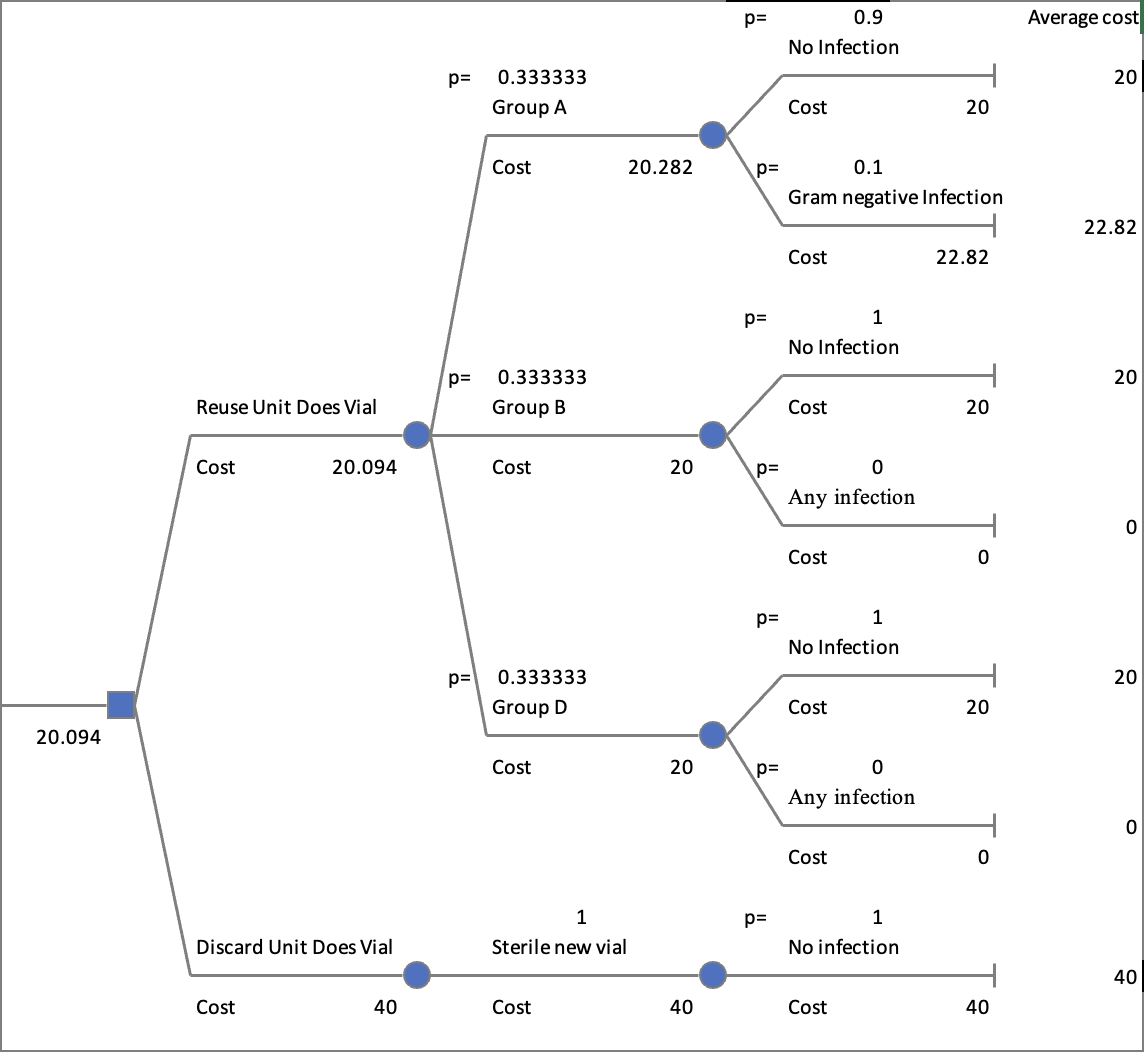
Supplement 3 Decision Tree for the best case*

*Supplement 4 Decision tree for the Worst case*


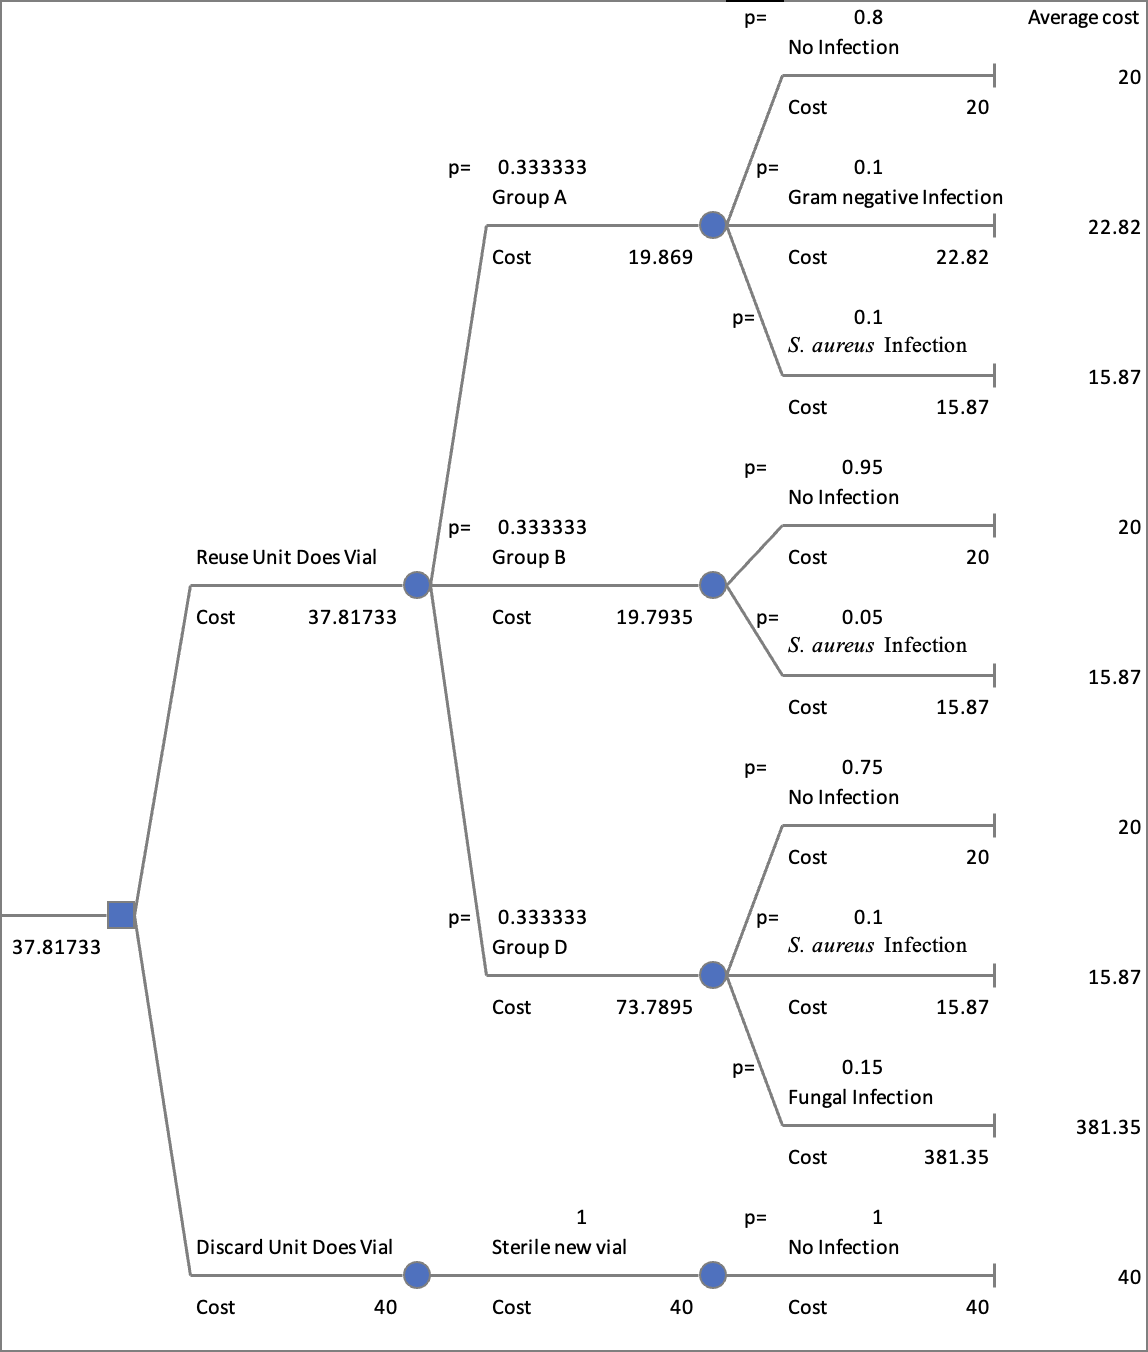

Supplement: Supplementary file 1 [file a46b27f5ff31097ec78851fd.docx]
